# Supplementary material for: Features of Chromosome Introgression from Gossypium barbadense L. into G. hirsutum L. during the Development of Alien Substitution Lines
Source: MDPI journal article supplement (doi:10.3390/plants11040542), 2022-02-18
Supplement: s1 [file s1]

Table 1.

Crossing of aneuploid lines of cotton *G. hirsutum* L. with the line Pima 3-79 of the species *G. barbadense* L.

| Chromosome | Crossing variant | Number of bolls obtained |                        | Crossing, % |
|------------|------------------|--------------------------|------------------------|-------------|
|            |                  | Number of crosses        | Number of hybrid bolls |             |
| 2          | Mo11 x Pima 3-79 | 5                        | 3                      | 60,00       |
|            | Mo16 x Pima 3-79 | 12                       | 7                      | 58,33       |
|            | Mo19 x Pima 3-79 | 15                       | 11                     | 73,33       |
|            | Mo93 x Pima 3-79 | 2                        | 1                      | 50,00       |
| 4          | Mo7 x Pima 3-79  | 2                        | 1                      | 50,00       |
|            | Mo31 x Pima 3-79 | 5                        | 4                      | 80,00       |
|            | Mo38 x Pima 3-79 | 9                        | 6                      | 66,67       |
|            | Mo58 x Pima 3-79 | 4                        | 2                      | 50,00       |
|            | Mo59 x Pima 3-79 | 6                        | 5                      | 83,33       |
|            | Mo60 x Pima 3-79 | 3                        | 3                      | 100,00      |
|            | Mo66 x Pima 3-79 | 20                       | 4                      | 20,00       |
|            | Mo69 x Pima 3-79 | 8                        | 2                      | 25,00       |
|            | Mo70 x Pima 3-79 | 6                        | 4                      | 66,67       |
|            | Mo72 x Pima 3-79 | 12                       | 2                      | 16,66       |
|            | Mo73 x Pima 3-79 | 4                        | 1                      | 25,00       |
|            | Mo75 x Pima 3-79 | 6                        | 4                      | 66,67       |
|            | Mo89 x Pima 3-79 | 4                        | 2                      | 50,00       |
| 6          | Mo13 x Pima 3-79 | 10                       | 4                      | 40,00       |
|            | Mo34 x Pima 3-79 | 19                       | 5                      | 26,32       |
|            | Mo67 x Pima 3-79 | 5                        | 3                      | 60,00       |
|            | Mo92 x Pima 3-79 | 3                        | 2                      | 66,67       |
|            | Mo95 x Pima 3-79 | 16                       | 8                      | 50,00       |
| 7          | Mo27 x Pima 3-79 | 2                        | 1                      | 50,00       |
| 12         | Mo94xPima 3-79   | 3                        | 1                      | 33,33       |
| 17         | Mo56 x Pima 3-79 | 10                       | 4                      | 40,00       |
| 18         | Mo48 x Pima 3-79 | 6                        | 1                      | 16,66       |
| 21         | Mo42 x Pima 3-79 | 6                        | 1                      | 16,67       |
| 22         | Mo17 x Pima 3-79 | 7                        | 1                      | 14,29       |
| telo 6     | Telo12xPima 3-79 | 2                        | 1                      | 50,00       |
| telo 11    | Mo21 x Pima 3-79 | 3                        | 3                      | 100,00      |

**Table 2.**

**Setting of F<sub>0</sub> hybrid seeds obtained from crosses of aneuploid lines of the species *G.hirsutum* L. with the line Pima3-79 of the species *G.barbadense* L.**

| Chromosome | Crossing variant | Number of bolls | Number of seeds in bolls |                    | Total number of seeds and motes | Setting of hybrid seeds, % |
|------------|------------------|-----------------|--------------------------|--------------------|---------------------------------|----------------------------|
|            |                  |                 | matured                  | immature and motes |                                 |                            |
| -          | L-458xPima 3-79  | 4               | 79                       | 28                 | 107                             | 73,83±4,25                 |
| 2          | Mo11xPima 3-79   | 3               | 26                       | 57                 | 83                              | 31,33±5,09                 |
|            | Mo16xPima 3-79   | 7               | 74                       | 135                | 209                             | 35,41±3,31                 |
|            | Mo19xPima 3-79   | 11              | 152                      | 221                | 373                             | 40,75±2,54                 |
|            | Mo93xPima 3-79   | 1               | 17                       | 11                 | 28                              | 60,71±10,48                |
|            | Mo7xPima 3-79    | 1               | 9                        | 13                 | 22                              | 40,91±10,48                |
| 4          | Mo31xPima 3-79   | 4               | 56                       | 87                 | 143                             | 39,16±4,08                 |
|            | Mo38 xPima 3-79  | 6               | 79                       | 77                 | 156                             | 50,64±4,00                 |
|            | Mo58 xPima 3-79  | 2               | 23                       | 36                 | 59                              | 38,98±6,35                 |
|            | Mo59 xPima 3-79  | 5               | 79                       | 122                | 201                             | 39,30±3,45                 |
|            | Mo60 xPima 3-79  | 3               | 31                       | 53                 | 84                              | 36,90±5,27                 |
|            | Mo66xPima 3-79   | 4               | 29                       | 31                 | 60                              | 48,33±6,45                 |
|            | Mo69 xPima 3-79  | 2               | 23                       | 26                 | 49                              | 46,94±7,13                 |
|            | Mo70xPima 3-79   | 2               | 19                       | 54                 | 73                              | 26,03±5,14                 |
|            | Mo72xPima 3-79   | 2               | 41                       | 43                 | 84                              | 51,52±6,15                 |
|            | Mo73xPima 3-79   | 1               | 21                       | 13                 | 34                              | 61,76±8,33                 |
|            | Mo75 xPima 3-79  | 4               | 75                       | 67                 | 142                             | 52,82±4,19                 |
|            | Mo89xPima 3-79   | 2               | 29                       | 31                 | 60                              | 48,33±6,45                 |
|            | Mo13 xPima 3-79  | 3               | 33                       | 60                 | 93                              | 35,48±4,96                 |
| 6          | Mo34 xPima 3-79  | 3               | 34                       | 68                 | 102                             | 33,33±4,67                 |
|            | Mo67 xPima 3-79  | 2               | 11                       | 48                 | 59                              | 18,64±5,07                 |
|            | Mo92 xPima 3-79  | 2               | 17                       | 43                 | 60                              | 28,33±5,82                 |
|            | Mo95 xPima 3-79  | 8               | 77                       | 219                | 296                             | 26,01±2,55                 |
| 7          | Mo27 xPima 3-79  | 1               | 17                       | 26                 | 43                              | 39,53±7,46                 |
| 12         | Mo94xPima 3-79   | 1               | 19                       | 14                 | 33                              | 57,58±8,60                 |
| 17         | Mo56xPima 3-79   | 4               | 56                       | 80                 | 136                             | 41,17±4,22                 |
| 18         | Mo48 xPima 3-79  | 1               | 19                       | 4                  | 23                              | 82,61±7,90                 |
| 21         | Mo42xPima 3-79   | 1               | 21                       | 13                 | 34                              | 61,76 ±8,33                |
| 22         | Mo17xPima 3-79   | 1               | 10                       | 24                 | 34                              | 29,41±7,81                 |
| telo 6     | Telo12xPima 3-79 | 1               | 29                       | 13                 | 42                              | 69,05±7,13                 |
| telo 11    | Mo21xPima 3-79   | 3               | 12                       | 63                 | 75                              | 16,00±4,23                 |

**Table 3.**

**Germination of F<sub>0</sub> hybrid seeds obtained from crosses of aneuploid lines of the species *G. hirsutum* L. with the line Pima 3-79 of the species *G. barbadense* L.**

| <b>Chromosome</b> | <b>Crossing variant</b>           | <b>Number of seeds sown</b> | <b>Number of shoots</b> | <b>Germination, %</b> |
|-------------------|-----------------------------------|-----------------------------|-------------------------|-----------------------|
| -                 | F <sub>1</sub> L-458 x Pima 3-79  | 6                           | 4                       | 66,67                 |
| <b>2</b>          | F <sub>1</sub> Mo11 x Pima 3-79   | 17                          | 16                      | 94,12                 |
|                   | F <sub>1</sub> Mo16 x Pima 3-79   | 8                           | 8                       | 100,00                |
|                   | F <sub>1</sub> Mo19 x Pima 3-79   | 14                          | 8                       | 57,14                 |
|                   | F <sub>1</sub> Mo93 x Pima 3-79   | 15                          | 11                      | 73,33                 |
| <b>4</b>          | F <sub>1</sub> Mo7 x Pima 3-79    | 9                           | 7                       | 77,78                 |
|                   | F <sub>1</sub> Mo31 x Pima 3-79   | 19                          | 4                       | 21,05                 |
|                   | F <sub>1</sub> Mo38 x Pima 3-79   | 37                          | 28                      | 75,68                 |
|                   | F <sub>1</sub> Mo58 x Pima 3-79   | 13                          | 7                       | 53,85                 |
|                   | F <sub>1</sub> Mo59 x Pima 3-79   | 29                          | 18                      | 62,07                 |
|                   | F <sub>1</sub> Mo60 x Pima 3-79   | 24                          | 18                      | 75,00                 |
|                   | F <sub>1</sub> Mo66 x Pima 3-79   | 22                          | 8                       | 36,36                 |
|                   | F <sub>1</sub> Mo69 x Pima 3-79   | 21                          | 11                      | 52,38                 |
|                   | F <sub>1</sub> Mo70x Pima 3-79    | 19                          | 12                      | 63,16                 |
|                   | F <sub>1</sub> Mo72 x Pima 3-79   | 20                          | 13                      | 65,00                 |
|                   | F <sub>1</sub> Mo73 x Pima 3-79   | 21                          | 14                      | 66,67                 |
|                   | F <sub>1</sub> Mo75 x Pima 3-79   | 15                          | 12                      | 80,00                 |
|                   | F <sub>1</sub> Mo89 x Pima 3-79   | 29                          | 13                      | 44,83                 |
|                   | F <sub>1</sub> Mo13 x Pima 3-79   | 8                           | 8                       | 100                   |
| <b>6</b>          | F <sub>1</sub> Mo34 x Pima 3-79   | 58                          | 44                      | 75,86                 |
|                   | F <sub>1</sub> Mo67 x Pima 3-79   | 6                           | 4                       | 66,67                 |
|                   | F <sub>1</sub> Mo92 x Pima 3-79   | 15                          | 15                      | 100                   |
|                   | F <sub>1</sub> Mo95 x Pima 3-79   | 42                          | 34                      | 80,95                 |
| <b>7</b>          | F <sub>1</sub> Mo27 x Pima 3-79   | 17                          | 15                      | 88,24                 |
| <b>12</b>         | F <sub>1</sub> Mo94xPima 3-79     | 19                          | 16                      | 84,21                 |
| <b>17</b>         | F <sub>1</sub> Mo56xPima 3-79     | 19                          | 17                      | 89,47                 |
| <b>18</b>         | F <sub>1</sub> Mo48 xPima 3-79    | 19                          | 17                      | 89,47                 |
| <b>21</b>         | F <sub>1</sub> Mo42xPima 3-79     | 21                          | 13                      | 61,90                 |
| <b>22</b>         | F <sub>1</sub> Mo17xPima 3-79     | 10                          | 7                       | 70,00                 |
| <b>telo 6</b>     | F <sub>1</sub> Telo12 x Pima 3-79 | 28                          | 27                      | 96,43                 |
| <b>telo 11</b>    | F <sub>1</sub> Mo21 x Pima 3-79   | 18                          | 16                      | 88,88                 |

**Table 4.**

**Analysis of hybrid F<sub>1</sub> offspring obtained from crosses of aneuploid lines of the species *G. hirsutum* L. with the line Pima 3-79 of the species *G. barbadense* L.**

| Chromosome | Crossing variant                | Total number of hybrid plants in the family | Number of studied plants | Number of disomics (2n=52) | Number of monosomics (2n=51) | Number of monotelodisomics (2n=51+I') |
|------------|---------------------------------|---------------------------------------------|--------------------------|----------------------------|------------------------------|---------------------------------------|
| 2          | F <sub>1</sub> Mo11xPima 3-79   |                                             |                          |                            |                              |                                       |
|            | 765 n                           | 9                                           | 2                        | 2                          | -                            |                                       |
|            | 766 n                           | 7                                           | 1                        | -                          | 1                            |                                       |
|            | F <sub>1</sub> Mo16xPima 3-79   |                                             |                          |                            |                              |                                       |
|            | 98 n                            | 8                                           | 6                        | 4                          | 2                            |                                       |
|            | F <sub>1</sub> Mo19 x Pima 3-79 |                                             |                          |                            |                              |                                       |
|            | 99 n                            | 8                                           | 8                        | 8                          | -                            |                                       |
|            | 768 n                           | 1                                           | 1                        | -                          | 1                            |                                       |
|            | 769 n                           | 6                                           | 4                        | 3                          | 1                            |                                       |
|            | F <sub>1</sub> Mo93 x Pima 3-79 |                                             |                          |                            |                              |                                       |
| 4          | 516 n                           | 11                                          | 9                        | 7                          | 2                            |                                       |
|            | F <sub>1</sub> Mo7xPima 3-79    |                                             |                          |                            |                              |                                       |
|            | 683 n                           | 7                                           | 4                        | 2                          | 2                            |                                       |
|            | F <sub>1</sub> Mo31xPima 3-79   |                                             |                          |                            |                              |                                       |
|            | 770 n                           | 4                                           | 2                        | -                          | 2                            |                                       |
|            | F <sub>1</sub> Mo38xPima 3-79   |                                             |                          |                            |                              |                                       |
|            | 690 n                           | 13                                          | 4                        | 3                          | 1                            |                                       |
|            | F <sub>1</sub> Mo58xPima 3-79   |                                             |                          |                            |                              |                                       |
|            | 530 n                           | 7                                           | 4                        | 1                          | 3                            |                                       |
|            | F <sub>1</sub> Mo59xPima 3-79   |                                             |                          |                            |                              |                                       |
|            | 531 n                           | 10                                          | 5                        | 2                          | 3                            |                                       |
|            | F <sub>1</sub> Mo60xPima 3-79   |                                             |                          |                            |                              |                                       |
|            | 694 n                           | 9                                           | 2                        | 1                          | 1                            |                                       |
|            | F <sub>1</sub> Mo69xPima 3-79   |                                             |                          |                            |                              |                                       |
|            | 695 n                           | 7                                           | 6                        | 6                          | -                            |                                       |
|            | 696 n                           | 11                                          | 7                        | 6                          | 1                            |                                       |
|            | F <sub>1</sub> Mo70xPima 3-79   |                                             |                          |                            |                              |                                       |
|            | 774 n                           | 9                                           | 5                        | 3                          | 2                            |                                       |
|            | 775 n                           | 3                                           | -                        | -                          | -                            |                                       |
|            | F <sub>1</sub> Mo75xPima 3-79   |                                             |                          |                            |                              |                                       |
| 6          | 104 n                           | 12                                          | 5                        | 1                          | 4                            |                                       |
|            | F <sub>1</sub> Mo89 xPima 3-79  |                                             |                          |                            |                              |                                       |
|            | 515 n                           | 8                                           | 8                        | 5                          | 3                            |                                       |
|            | 913 n                           | 8                                           | -                        | -                          | -                            |                                       |
|            | F <sub>1</sub> Mo13 x Pima 3-79 |                                             |                          |                            |                              |                                       |
|            | 97 n                            | 5                                           | 3                        | 3                          | -                            |                                       |
|            | 767 n                           | 2                                           | 2                        | 1                          | 1                            |                                       |
|            | F <sub>1</sub> Mo34 x Pima 3-79 |                                             |                          |                            |                              |                                       |
|            | 2 n                             | 8                                           | 6                        | 5                          | 1                            |                                       |
|            | 688 n                           | 9                                           | 4                        | 3                          | 1                            |                                       |
|            | 911 n                           | 8                                           | 8                        | 7                          | 1                            |                                       |
|            | F <sub>1</sub> Mo67 x Pima 3-79 |                                             |                          |                            |                              |                                       |
|            | 308 n                           | 4                                           | 1                        | -                          | 1                            |                                       |
|            | F <sub>1</sub> Mo92 x Pima 3-79 |                                             |                          |                            |                              |                                       |
|            | 539 n                           | 8                                           | 7                        | 6                          | 1                            |                                       |
|            | 540 n                           | 6                                           | 1                        | 1                          | -                            |                                       |
|            | F <sub>1</sub> Mo95 x Pima 3-79 |                                             |                          |                            |                              |                                       |
|            | 105 n                           | 3                                           | 2                        | 2                          | -                            |                                       |
|            | 106 n                           | 8                                           | 4                        | 2                          | 2                            |                                       |

|         |                                   |    |    |    |   |   |
|---------|-----------------------------------|----|----|----|---|---|
|         | 107 n                             | 6  | 2  | 2  | - |   |
|         | 108 n                             | 11 | 7  | 5  | 2 |   |
| 7       | F <sub>1</sub> Mo27 x Pima 3-79   |    |    |    |   |   |
|         | 687 n                             | 15 | 7  | 6  | 1 |   |
| 12      | F <sub>1</sub> Mo94 x Pima 3-79   |    |    |    |   |   |
|         | 8 n                               | 16 | 9  | 6  | 3 |   |
| 17      | F <sub>1</sub> Mo56 x Pima 3-79   |    |    |    |   |   |
|         | 4 n                               | 17 | 17 | 15 | 2 |   |
| 18      | F <sub>1</sub> Mo48 x Pima 3-79   |    |    |    |   |   |
|         | 529 n                             | 17 | 10 | 9  | 1 |   |
| 21      | F <sub>1</sub> Mo42 x Pima 3-79   |    |    |    |   |   |
|         | 528 n                             | 13 | 13 | 12 | 1 |   |
| 22      | F <sub>1</sub> Mo17 x Pima 3-79   |    |    |    |   |   |
|         | 685 n                             | 7  | 5  | 3  | 2 |   |
| telo 6  | F <sub>1</sub> Telo12 x Pima 3-79 |    |    |    |   |   |
|         | 542 n                             | 24 | 14 | 12 | - | 2 |
| telo 11 | F <sub>1</sub> Mo21 x Pima 3-79   |    |    |    |   |   |
|         | 100 n                             | 3  | 3  | 2  | - | 1 |

Table 5.

Pairing of chromosomes at the metaphase I stage of meiosis in aneuploids F<sub>1</sub> hybrids obtained from crosses of aneuploid lines of the species *G. hirsutum* L. with the line Pima 3-79 of the species *G. barbadense* L.

| Chromosome                    | Crossing variant               | Hybrid                       | Univalent size   | Examine<br>d cells in<br>MI | Average number per cell |            |                  |
|-------------------------------|--------------------------------|------------------------------|------------------|-----------------------------|-------------------------|------------|------------------|
|                               |                                |                              |                  |                             | univalent               | bivalents  | quadrival<br>ent |
|                               | L-458                          | -                            | -                | 11                          | -                       | 26,00±0,00 | 0                |
|                               | Pima 3-79                      | -                            | -                | 15                          | -                       | 26,00±0,00 | 0                |
|                               | F <sub>1</sub> L-458xPima 3-79 | 680                          | -                | 10                          | -                       | 26,00±0,00 | 0                |
| 2                             | F <sub>1</sub> Mo11xPima 3-79  | 766 <sub>3</sub>             | Large            | 8                           | 1,00±0,00               | 25,00±0,00 | 0                |
|                               | F <sub>1</sub> Mo16xPima 3-79  | 98 <sub>2</sub>              | Large            | 6                           | 1,00±0,00               | 25,00±0,00 | 0                |
|                               |                                | 98 <sub>6</sub>              | Large            | 16                          | 1,00±0,00               | 25,00±0,00 | 0                |
|                               | F <sub>1</sub> Mo19xPima 3-79  | 768 <sub>1</sub>             | Large            | 11                          | 1,00±0,00               | 25,00±0,00 | 0                |
|                               |                                | 769 <sub>2</sub>             | Large            | 14                          | 1,00±0,00               | 25,00±0,00 | 0                |
|                               | F <sub>1</sub> Mo93xPima 3-79  | 516 <sub>2</sub>             | Large            | 11                          | 1,00±0,00               | 25,00±0,00 | 0                |
|                               |                                | 516 <sub>4</sub>             | Large            | 14                          | 1,00±0,00               | 25,00±0,00 | 0                |
|                               | 4                              | F <sub>1</sub> Mo7xPima 3-79 | 683 <sub>1</sub> | Medium                      | 20                      | 1,00±0,00  | 25,00±0,00       |
| 683 <sub>2</sub>              |                                |                              | Medium           | 14                          | 1,00±0,00               | 25,00±0,00 | 0                |
| F <sub>1</sub> Mo31xPima 3-79 |                                | 770 <sub>1</sub>             | Medium           | 14                          | 1,00±0,00               | 25,00±0,00 | 0                |
|                               |                                | 770 <sub>2</sub>             | Medium           | 11                          | 1,00±0,00               | 25,00±0,00 | 0                |
| F <sub>1</sub> Mo38xPima 3-79 |                                | 690 <sub>11</sub>            | Medium           | 20                          | 1,00±0,00               | 25,00±0,00 | 0                |
|                               |                                | 915 <sub>7</sub>             | Medium           | 5                           | 1,00±0,00               | 25,00±0,00 | 0                |
| F <sub>1</sub> Mo58xPima 3-79 |                                | 530 <sub>2</sub>             | Medium           | 26                          | 1,00±0,00               | 25,00±0,00 | 0                |
|                               |                                | 530 <sub>3</sub>             | Medium           | 23                          | 1,00±0,00               | 25,00±0,00 | 0                |
|                               |                                | 530 <sub>7</sub>             | Medium           | 5                           | 1,00±0,00               | 25,00±0,00 | 0                |
| F <sub>1</sub> Mo59xPima 3-79 |                                | 531 <sub>2</sub>             | Medium           | 9                           | 1,00±0,00               | 25,00±0,00 | 0                |
|                               |                                | 531 <sub>6</sub>             | Medium           | 9                           | 1,00±0,00               | 25,00±0,00 | 0                |
|                               |                                | 531 <sub>8</sub>             | Medium           | 6                           | 1,00±0,00               | 25,00±0,00 | 0                |
| F <sub>1</sub> Mo60xPima 3-79 |                                | 694 <sub>5</sub>             | Medium           | 21                          | 1,00±0,00               | 25,00±0,00 | 0                |
|                               |                                | 912 <sub>2</sub>             | Medium           | 24                          | 1,00±0,00               | 25,00±0,00 | 0                |
| F <sub>1</sub> Mo69xPima 3-79 |                                | 696 <sub>9</sub>             | Medium           | 14                          | 1,00±0,00               | 25,00±0,00 | 0                |
| F <sub>1</sub> Mo70xPima 3-79 |                                | 774 <sub>6</sub>             | Medium           | 20                          | 1,00±0,00               | 25,00±0,00 | 0                |
|                               |                                | 774 <sub>7</sub>             | Medium           | 8                           | 1,00±0,00               | 25,00±0,00 | 0                |
| F <sub>1</sub> Mo75xPima 3-79 |                                | 104 <sub>2</sub>             | Medium           | 5                           | 1,00±0,00               | 25,00±0,00 | 0                |
|                               |                                | 104 <sub>11</sub>            | Medium           | 10                          | 1,00±0,00               | 25,00±0,00 | 0                |
| F <sub>1</sub> Mo89xPima 3-79 |                                | 515 <sub>2</sub>             | Medium           | 14                          | 1,00±0,00               | 25,00±0,00 | 0                |
|                               | 515 <sub>5</sub>               | Medium                       | 9                | 1,00±0,00                   | 25,00±0,00              | 0          |                  |
|                               | 515 <sub>7</sub>               | Medium                       | 5                | 1,00±0,00                   | 25,00±0,00              | 0          |                  |
| 6                             | F <sub>1</sub> Mo13xPima 3-79  | 767 <sub>1</sub>             | Large            | 17                          | 1,00±0,00               | 25,00±0,00 | 0                |
|                               | F <sub>1</sub> Mo34xPima 3-79  | 2 <sub>8</sub>               | Large            | 22                          | 1,09±0,16               | 24,95±0,08 | 0                |
|                               |                                | 688 <sub>9</sub>             | Large            | 26                          | 1,00±0,00               | 25,00±0,00 | 0                |
|                               |                                | 911 <sub>8</sub>             | Large            | 15                          | 1,00±0,00               | 25,00±0,00 | 0                |
|                               | F <sub>1</sub> Mo67xPima 3-79  | 308 <sub>1</sub>             | Large            | 5                           | 1,00±0,00               | 25,00±0,00 | 0                |
|                               | F <sub>1</sub> Mo92xPima 3-79  | 539 <sub>5</sub>             | Large            | 21                          | 1,00±0,00               | 25,00±0,00 | 0                |
|                               | F <sub>1</sub> Mo95xPima 3-79  | 106 <sub>2</sub>             | Large            | 7                           | 1,00±0,00               | 25,00±0,00 | 0                |
|                               |                                | 106 <sub>5</sub>             | Large            | 15                          | 1,00±0,00               | 24,93±0,06 | 0,07±0,06        |
| 108 <sub>3</sub>              |                                | Large                        | 15               | 1,00±0,00                   | 25,00±0,00              | 0          |                  |
| 108 <sub>10</sub>             |                                | Large                        | 5                | 1,00±0,00                   | 25,00±0,00              | 0          |                  |

|                |                                 |                   |              |    |           |             |   |
|----------------|---------------------------------|-------------------|--------------|----|-----------|-------------|---|
| <b>7</b>       | F <sub>1</sub> Mo27xPima 3-79   | 687 <sub>4</sub>  | Medium       | 10 | 1,00±0,00 | 25,00±0,00  | 0 |
| <b>12</b>      | F <sub>1</sub> Mo94xPima 3-79   | 8 <sub>1</sub>    | Large        | 2  | 1,00±0,00 | 25,00±0,00  | 0 |
|                |                                 | 8 <sub>3</sub>    | Large        | 28 | 1,00±0,00 | 25,00±0,00  | 0 |
|                |                                 | 8 <sub>13</sub>   | Large        | 13 | 1,00±0,00 | 25,00±0,00  | 0 |
| <b>17</b>      | F <sub>1</sub> Mo56xPima 3-79   | 4 <sub>13</sub>   | Medium-small | 9  | 1,00±0,00 | 25,00±0,00  | 0 |
|                |                                 | 4 <sub>17</sub>   | Medium-small | 9  | 1,00±0,00 | 25,00±0,00  | 0 |
| <b>18</b>      | F <sub>1</sub> Mo48xPima 3-79   | 529 <sub>16</sub> | Small        | 22 | 1,00±0,00 | 25,00±0,00  | 0 |
| <b>21</b>      | F <sub>1</sub> Mo42xPima 3-79   | 528 <sub>1</sub>  | Medium-small | 10 | 1,00±0,00 | 25,00±0,00  | - |
| <b>22</b>      | F <sub>1</sub> Mo17xPima 3-79   | 685 <sub>3</sub>  | Medium-small | 7  | 1,00±0,00 | 25,00±0,00  | - |
|                |                                 | 685 <sub>7</sub>  | Medium-small | 18 | 1,00±0,00 | 25,00±0,00  | - |
| <b>telo 6</b>  | F <sub>1</sub> Telo12xPima 3-79 | 542 <sub>8</sub>  | -            | 3  | 0         | 26,00±0,00* | 0 |
|                |                                 | 542 <sub>16</sub> | -            | 4  | 0         | 26,00±0,00* | 0 |
| <b>telo 11</b> | F <sub>1</sub> Mo21xPima 3-79   | 100 <sub>1</sub>  | -            | 15 | 0         | 26,00±0,00* | 0 |
|                |                                 | 102 <sub>1</sub>  | -            | 4  | 0         | 26,00±0,00* | 0 |

Note – 25 normal (closed) bivalents and one heteromorphic (open) bivalent.

Table 6.

Analysis of sporades in interspecific F<sub>1</sub> hybrids obtained from crosses of aneuploid lines of the species *G. hirsutum* L. with the line Pima3-79 of the species *G. barbadense* L.

| Chromosome | Crossing variant                | Hybrid            | Total number of microspores | Meiotic index, % | % of tetrads with micronuclei         |
|------------|---------------------------------|-------------------|-----------------------------|------------------|---------------------------------------|
|            | L-458                           | -                 | 1125                        | 99,02±0,29       | 0,36±0,18                             |
|            | Pima 3-79                       | -                 | 1130                        | 98,58±0,35       | 0,27±0,15                             |
|            | L-458 x Pima 3-79               | 680               | 2535                        | 98,62±0,23       | 0,04±0,04                             |
| 2          | F <sub>1</sub> Mo11xPima 3-79   | 766 <sub>3</sub>  | 1567                        | 98,72±0,28       | 0,51±0,18                             |
|            | F <sub>1</sub> Mo16xPima 3-79   | 98 <sub>2</sub>   | 3524                        | 98,50±0,21       | 0,57±0,13                             |
| 4          | F <sub>1</sub> Mo7xPima 3-79    | 683 <sub>1</sub>  | 576                         | 98,07±0,58       | 1,23±0,46                             |
|            |                                 | 683 <sub>2</sub>  | 4775                        | 98,35±0,18       | 0,02±0,02                             |
|            | F <sub>1</sub> Mo31xPima 3-79   | 770 <sub>1</sub>  | 592                         | 96,28±0,78       | 2,03±0,58                             |
|            |                                 | 770 <sub>2</sub>  | 1031                        | 96,99±0,53       | 0,10±0,10                             |
|            | F <sub>1</sub> Mo38xPima 3-79   | 690 <sub>11</sub> | 1182                        | 96,79±0,51       | 1,18±0,31                             |
|            |                                 | 530 <sub>2</sub>  | 1023                        | 98,44±0,39       | 0,10±0,10                             |
|            |                                 | 530 <sub>3</sub>  | 2902                        | 97,38±0,30       | 0,41±0,12                             |
|            | F <sub>1</sub> Mo58xPima 3-79   | 530 <sub>7</sub>  | 1764                        | 96,88±0,41       | 0,68±0,20                             |
|            |                                 | 531 <sub>2</sub>  | 1476                        | 99,93±0,07       | 0,14±0,10                             |
|            |                                 | 531 <sub>6</sub>  | 2904                        | 99,52±0,13       | 0,07±0,05                             |
|            | F <sub>1</sub> Mo59xPima 3-79   | 531 <sub>8</sub>  | 3694                        | 98,35±0,21       | 0,14±0,06                             |
|            |                                 | 694 <sub>5</sub>  | 4768                        | 96,02±0,28       | 1,15±0,15                             |
|            |                                 | 696 <sub>9</sub>  | 1469                        | 98,57±0,31       | 0,00±0,00                             |
|            | F <sub>1</sub> Mo70xPima 3-79   | 774 <sub>6</sub>  | 1435                        | 90,73±0,77       | 0,00±0,00<br><b>(9,20±0,76 monad)</b> |
|            |                                 | 774 <sub>7</sub>  | 2167                        | 98,29±0,28       | 0,05±0,05                             |
|            | F <sub>1</sub> Mo75xPima 3-79   | 104 <sub>2</sub>  | 1639                        | 99,08±0,24       | 0,06±0,06                             |
|            |                                 | 104 <sub>11</sub> | 990                         | 99,19±0,28       | 0,10±0,10                             |
|            | F <sub>1</sub> Mo89xPima 3-79   | 515 <sub>2</sub>  | 2431                        | 98,31±0,26       | 0,70±0,17                             |
|            |                                 | 515 <sub>7</sub>  | 1008                        | 97,62±0,48       | 0,30±0,17                             |
| 6          | F <sub>1</sub> Mo13xPima 3-79   | 767 <sub>1</sub>  | 5600                        | 98,04±0,19       | 0,38±0,08                             |
|            | F <sub>1</sub> Mo34xPima 3-79   | 2 <sub>8</sub>    | 1025                        | 97,76±0,46       | 0,98±0,31                             |
|            |                                 | 688 <sub>9</sub>  | 2831                        | 97,39±0,30       | 0,74±0,16                             |
|            |                                 | 911 <sub>8</sub>  | 1027                        | 97,57±0,48       | 0,97±0,31                             |
|            | F <sub>1</sub> Mo67xPima 3-79   | 308 <sub>1</sub>  | 1588                        | 95,78±0,50       | 0,44±0,17                             |
|            | F <sub>1</sub> Mo92xPima 3-79   | 539 <sub>5</sub>  | 1659                        | 98,81±1,19       | 1,86±0,22                             |
|            | F <sub>1</sub> Mo95xPima 3-79   | 106 <sub>2</sub>  | 1190                        | 99,16±0,26       | 0,00±0,00                             |
|            |                                 | 106 <sub>5</sub>  | 986                         | 94,32±0,74       | 0,81±0,29                             |
| 7          | F <sub>1</sub> Mo27xPima 3-79   | 687 <sub>4</sub>  | 2348                        | 95,87±0,41       | 0,38±0,13                             |
| 12         | F <sub>1</sub> Mo94xPima 3-79   | 8 <sub>1</sub>    | 5196                        | 98,54±0,17       | 0,27±0,07                             |
|            |                                 | 8 <sub>3</sub>    | 4272                        | 98,08±0,21       | 0,33±0,09                             |
|            |                                 | 8 <sub>13</sub>   | 967                         | 98,35±0,41       | 1,24±0,36                             |
| 17         | F <sub>1</sub> Mo56xPima 3-79   | 4 <sub>17</sub>   | 1015                        | 97,54±0,49       | 0,99±0,31                             |
| 18         | F <sub>1</sub> Mo48xPima 3-79   | 529 <sub>16</sub> | 5002                        | 98,14±0,19       | 0,04±0,03                             |
| 21         | F <sub>1</sub> Mo42xPima 3-79   | 528 <sub>1</sub>  | 1846                        | 97,67±0,35       | 0,11±0,08                             |
| 22         | F <sub>1</sub> Mo17xPima 3-79   | 685 <sub>7</sub>  | 1774                        | 99,27±0,20       | 0,28±0,13                             |
| telo 6     | F <sub>1</sub> Telo12xPima 3-79 | 542 <sub>8</sub>  | 1248                        | 98,56±0,34       | 0,00±0,00                             |
|            |                                 | 542 <sub>16</sub> | 4254                        | 98,40±0,19       | 0,07±0,04                             |
| telo 11    | F <sub>1</sub> Mo21xPima 3-79   | 100 <sub>1</sub>  | 4074                        | 98,82±0,17       | 0,05±0,03                             |



|  |  |                  |      |            |           |
|--|--|------------------|------|------------|-----------|
|  |  | 102 <sub>1</sub> | 1147 | 95,64±0,60 | 0,35±0,17 |
|--|--|------------------|------|------------|-----------|

Table 7.

Analysis of pollen fertility in interspecific F<sub>1</sub> hybrids obtained from crosses of aneuploid lines of the species *G. hirsutum* L. with the line Pima 3-79 of the species *G. barbadense* L.

| Chromosome | Crossing variant               | Hybrid            | Total pollen count | Pollen fertility, % | Pollen sterility, % |
|------------|--------------------------------|-------------------|--------------------|---------------------|---------------------|
|            | L-458                          | -                 | 628                | 90,92±1,15          | 9,08±1,15           |
|            | Pima 3-79                      | -                 | 581                | 84,34±1,51          | 15,66±1,51          |
|            | F <sub>1</sub> L-458xPima 3-79 | 680               | 536                | 80,78±1,70          | 19,22±1,70          |
| 2          | F <sub>1</sub> Mo11xPima 3-79  | 766 <sub>3</sub>  | 838                | 83,41±1,28          | 16,59±1,28          |
|            | F <sub>1</sub> Mo16xPima 3-79  | 98 <sub>2</sub>   | 853                | 79,13±1,39          | 20,87±1,39          |
|            |                                | 98 <sub>6</sub>   | 526                | 80,42±1,73          | 19,58±1,73          |
|            | F <sub>1</sub> Mo19xPima 3-79  | 769 <sub>2</sub>  | 560                | 85,71±1,48          | 14,29±1,48          |
|            | F <sub>1</sub> Mo93xPima 3-79  | 516 <sub>2</sub>  | 712                | 82,02±1,44          | 17,98±1,44          |
|            |                                | 516 <sub>4</sub>  | 224                | 78,13±2,76          | 21,88±2,76          |
| 4          | F <sub>1</sub> Mo7xPima 3-79   | 683 <sub>1</sub>  | 881                | 90,12±1,01          | 9,88±1,01           |
|            |                                | 683 <sub>2</sub>  | 920                | 79,89±1,32          | 20,11±1,32          |
|            | F <sub>1</sub> Mo31xPima 3-79  | 770 <sub>1</sub>  | 503                | 89,07±1,39          | 10,93±1,39          |
|            |                                | 770 <sub>2</sub>  | 920                | 89,13±1,03          | 10,87±1,03          |
|            | F <sub>1</sub> Mo38xPima 3-79  | 690 <sub>11</sub> | 936                | 86,11±19,97         | 13,89±1,13          |
|            | F <sub>1</sub> Mo58xPima 3-79  | 530 <sub>2</sub>  | 1328               | 83,51±1,02          | 16,49±1,02          |
|            |                                | 530 <sub>3</sub>  | 1115               | 84,39±1,09          | 15,61±1,09          |
|            |                                | 530 <sub>7</sub>  | 319                | 83,07±2,10          | 16,93±2,10          |
|            | F <sub>1</sub> Mo59xPima 3-79  | 531 <sub>2</sub>  | 899                | 81,98±1,28          | 18,02±1,28          |
|            |                                | 531 <sub>6</sub>  | 298                | 89,93±1,74          | 10,07±1,74          |
|            |                                | 531 <sub>8</sub>  | 425                | 72,24±2,17          | 27,76±2,17          |
|            | F <sub>1</sub> Mo60xPima 3-79  | 694 <sub>5</sub>  | 774                | 75,97±1,54          | 24,03±1,54          |
|            |                                | 912 <sub>2</sub>  | 633                | 92,10±1,07          | 7,90±1,07           |
|            | F <sub>1</sub> Mo69xPima 3-79  | 696 <sub>9</sub>  | 925                | 82,59±1,25          | 17,41±1,25          |
|            | F <sub>1</sub> Mo70xPima 3-79  | 774 <sub>6</sub>  | 619                | 91,44±1,12          | 8,56±1,12           |
|            |                                | 774 <sub>7</sub>  | 680                | 87,50±1,27          | 12,50±1,27          |
|            | F <sub>1</sub> Mo75xPima 3-79  | 104 <sub>2</sub>  | 984                | 80,79±1,26          | 19,21±1,26          |
|            |                                | 104 <sub>11</sub> | 869                | 81,24±1,32          | 18,76±1,32          |
|            | F <sub>1</sub> Mo89xPima 3-79  | 515 <sub>2</sub>  | 1095               | 90,96±0,87          | 9,04±0,87           |
|            |                                | 515 <sub>7</sub>  | 942                | 90,23±0,97          | 9,77±0,97           |
| 6          | F <sub>1</sub> Mo13xPima 3-79  | 767 <sub>1</sub>  | 701                | 88,45±1,21          | 11,55±1,21          |
|            | F <sub>1</sub> Mo34xPima 3-79  | 2 <sub>8</sub>    | 790                | 87,34±1,18          | 12,66±1,18          |
|            |                                | 688 <sub>9</sub>  | 955                | 81,15±1,27          | 18,85±1,27          |
|            |                                | 911 <sub>8</sub>  | 938                | 85,18±1,16          | 14,82±1,16          |
|            | F <sub>1</sub> Mo67xPima 3-79  | 308 <sub>1</sub>  | 349                | 93,12±1,35          | 6,88±1,35           |
|            | F <sub>1</sub> Mo92xPima 3-79  | 539 <sub>5</sub>  | 1242               | 71,34±1,28          | 28,66±1,28          |
|            | F <sub>1</sub> Mo95xPima 3-79  | 106 <sub>2</sub>  | -                  | -                   | -                   |
|            |                                | 106 <sub>5</sub>  | 619                | 89,98±1,21          | 10,02±1,21          |
| 7          | F <sub>1</sub> Mo27xPima 3-79  | 687 <sub>4</sub>  | 672                | 84,23±1,41          | 15,77±1,41          |
| 12         | F <sub>1</sub> Mo94xPima 3-79  | 8 <sub>1</sub>    | 866                | 83,49±1,26          | 16,51±1,26          |
|            |                                | 8 <sub>3</sub>    | 522                | 84,87±1,57          | 15,13±1,57          |
|            |                                | 8 <sub>13</sub>   | 693                | 87,73±1,25          | 12,27±1,25          |
| 17         | F <sub>1</sub> Mo56xPima 3-79  | 4 <sub>13</sub>   | 211                | 88,63±2,19          | 11,37±2,19          |
|            |                                | 4 <sub>17</sub>   | 521                | 82,92±1,65          | 17,08±1,65          |
| 18         | F <sub>1</sub> Mo48xPima 3-79  | 529 <sub>16</sub> | 777                | 76,58±1,52          | 23,42±1,52          |
| 21         | F <sub>1</sub> Mo42xPima 3-79  | 528 <sub>1</sub>  | 1086               | 82,69±1,15          | 17,31±1,15          |
| 22         | F <sub>1</sub> Mo17xPima 3-79  | 685 <sub>7</sub>  | 822                | 81,39±1,36          | 18,61±1,36          |

|                    |                                  |                   |     |            |            |
|--------------------|----------------------------------|-------------------|-----|------------|------------|
| <b>telo<br/>6</b>  | F <sub>1</sub> Telo12x Pima 3-79 | 542 <sub>8</sub>  | 345 | 72,17±2,41 | 27,83±2,41 |
|                    |                                  | 542 <sub>16</sub> | 763 | 79,03±1,47 | 20,97±1,47 |
| <b>telo<br/>11</b> | F <sub>1</sub> Mo21xPima 3-79    | 100 <sub>1</sub>  | 553 | 84,45±1,54 | 15,55±1,54 |
|                    |                                  | 102 <sub>1</sub>  | 581 | 90,53±1,21 | 9,47±1,21  |

Table 8.

**Crossing of monosomic and monotelodisome lines of cotton with interspecific aneuploid F<sub>1</sub> (Mo x Pima 3-79 or Telo x Pima 3-79) hybrids with substitutions of individual chromosomes or their arms**

| Chromosome | Hybrids                                                                      | Number of bolls received<br>(2014–2020) |                           | Crossing,<br>% |
|------------|------------------------------------------------------------------------------|-----------------------------------------|---------------------------|----------------|
|            |                                                                              | Number of<br>crosses                    | Number of<br>hybrid bolls |                |
| 2          | F <sub>1</sub> BC <sub>1</sub> (Mo16 x F <sub>1</sub> (98 <sub>6</sub> ))    | 25                                      | 6                         | 24,00          |
|            | F <sub>1</sub> BC <sub>1</sub> (Mo93x F <sub>1</sub> (516 <sub>2</sub> ))    | 3                                       | 1                         | 33,33          |
| 4          | F <sub>1</sub> BC <sub>1</sub> (Mo7x F <sub>1</sub> (683 <sub>1</sub> ))     | 3                                       | 1                         | 33,33          |
|            | F <sub>1</sub> BC <sub>1</sub> (Mo31 x F <sub>1</sub> (770 <sub>1</sub> ))   | 2                                       | 1                         | 50,00          |
|            | F <sub>1</sub> BC <sub>1</sub> (Mo38 x F <sub>1</sub> (690 <sub>11</sub> ))  | 9                                       | 2                         | 22,22          |
|            | F <sub>1</sub> BC <sub>1</sub> (Mo58 x F <sub>1</sub> (530 <sub>2</sub> ))   | 13                                      | 2                         | 15,38          |
|            | F <sub>1</sub> BC <sub>1</sub> (Mo59 x F <sub>1</sub> (531 <sub>2</sub> ))   | 8                                       | 1                         | 12,50          |
|            | F <sub>1</sub> BC <sub>1</sub> (Mo60 x F <sub>1</sub> (694 <sub>5</sub> ))   | 14                                      | 9                         | 64,29          |
|            | F <sub>1</sub> BC <sub>1</sub> (Mo75 x F <sub>1</sub> (104 <sub>2</sub> ))   | 10                                      | 6                         | 60,00          |
| 6          | F <sub>1</sub> BC <sub>1</sub> (Mo34 x F <sub>1</sub> (688 <sub>9</sub> ))   | 9                                       | 2                         | 22,22          |
|            | F <sub>1</sub> BC <sub>1</sub> (Mo67 x F <sub>1</sub> (308 <sub>1</sub> ))   | 5                                       | 1                         | 20,00          |
|            | F <sub>1</sub> BC <sub>1</sub> (Mo92 x F <sub>1</sub> (1040 <sub>2</sub> ))  | 13                                      | 3                         | 23,08          |
|            | F <sub>1</sub> BC <sub>1</sub> (Mo95 x F <sub>1</sub> (106 <sub>2</sub> ))   | 4                                       | 1                         | 25,00          |
| 7          | F <sub>1</sub> BC <sub>1</sub> (Mo27 x F <sub>1</sub> (687 <sub>4</sub> ))   | 13                                      | 7                         | 76,92          |
| 12         | F <sub>1</sub> BC <sub>1</sub> (Mo94 x F <sub>1</sub> (8 <sub>1</sub> ))     | 16                                      | 5                         | 31,25          |
| 17         | F <sub>1</sub> BC <sub>1</sub> (Mo56x F <sub>1</sub> (4 <sub>17</sub> ))     | 8                                       | 6                         | 75,00          |
| 18         | F <sub>1</sub> BC <sub>1</sub> (Mo48 x F <sub>1</sub> (529 <sub>16</sub> ))  | 16                                      | 2                         | 12,50          |
| 21         | F <sub>1</sub> BC <sub>1</sub> (Mo42 x F <sub>1</sub> (528 <sub>1</sub> ))   | 4                                       | 3                         | 75,00          |
| 22         | F <sub>1</sub> BC <sub>1</sub> (Mo17 x F <sub>1</sub> (685 <sub>7</sub> ))   | 4                                       | 2                         | 50,00          |
| telo<br>6  | F <sub>1</sub> BC <sub>1</sub> (Тело12 x F <sub>1</sub> (542 <sub>8</sub> )) | 3                                       | 1                         | 33,00          |
| telo<br>11 | F <sub>1</sub> BC <sub>1</sub> (Mo21xF <sub>1</sub> (100 <sub>1</sub> ))     | 5                                       | 4                         | 80,00          |

Table 9.

Setting of BC<sub>1</sub>F<sub>1</sub> hybrid seeds obtained from crosses of monosomic and monotelodisome lines with F<sub>1</sub> aneuploid hybrids with substitutions of specific chromosomes or their arms

| Chromosome    | Hybrids                                                                     | Number of bolls | Number of seeds |   |     | Total number of seeds and notes | Setting hybrid seeds, % |
|---------------|-----------------------------------------------------------------------------|-----------------|-----------------|---|-----|---------------------------------|-------------------------|
| <b>2</b>      | F <sub>1</sub> BC <sub>1</sub> (Mo16 x F <sub>1</sub> (98 <sub>6</sub> ))   | 6               | 62              | + | 85  | 147                             | 42,18±4,07              |
|               | F <sub>1</sub> BC <sub>1</sub> (Mo93xF <sub>1</sub> (516 <sub>2</sub> ))    | 1               | 3               | + | 24  | 27                              | 11,11±6,05              |
| <b>4</b>      | F <sub>1</sub> BC <sub>1</sub> (Mo7x F <sub>1</sub> (683 <sub>1</sub> ))    | 1               | 6               | + | 19  | 25                              | 24,00±8,54              |
|               | F <sub>1</sub> BC <sub>1</sub> (Mo31x F <sub>1</sub> (770 <sub>1</sub> ))   | 1               | 7               | + | 8   | 15                              | 46,67±12,88             |
|               | F <sub>1</sub> BC <sub>1</sub> (Mo38xF <sub>1</sub> (690 <sub>11</sub> ))   | 2               | 35              | + | 45  | 81                              | 44,44±5,52              |
|               | F <sub>1</sub> BC <sub>1</sub> (Mo58 x F <sub>1</sub> (530 <sub>2</sub> ))  | 2               | 15              | + | 51  | 66                              | 22,73±5,16              |
|               | F <sub>1</sub> BC <sub>1</sub> (Mo59 x F <sub>1</sub> (531 <sub>2</sub> ))  | 2               | 9               | + | 32  | 41                              | 21,95±6,46              |
|               | F <sub>1</sub> BC <sub>1</sub> (Mo60 x F <sub>1</sub> (694 <sub>5</sub> ))  | 4               | 30              | + | 82  | 112                             | 24,72±2,64              |
|               | F <sub>1</sub> BC <sub>1</sub> (Mo75 x F <sub>1</sub> (104 <sub>2</sub> ))  | 6               | 67              | + | 105 | 172                             | 38,95±3,72              |
| <b>6</b>      | F <sub>1</sub> BC <sub>1</sub> (Mo34 x F <sub>1</sub> (688 <sub>9</sub> ))  | 2               | 18              | + | 48  | 66                              | 27,27±5,48              |
|               | F <sub>1</sub> BC <sub>1</sub> (Mo67 x F <sub>1</sub> (308 <sub>1</sub> ))  | 1               | 7               | + | 16  | 23                              | 30,43±9,59              |
|               | F <sub>1</sub> BC <sub>1</sub> (Mo92 xF <sub>1</sub> (1040 <sub>2</sub> ))  | 3               | 8               | + | 76  | 84                              | 9,52±3,20               |
|               | F <sub>1</sub> BC <sub>1</sub> (Mo95 x F <sub>1</sub> (106 <sub>2</sub> ))  | 1               | 3               | + | 12  | 15                              | 20,00±10,33             |
| <b>7</b>      | F <sub>1</sub> BC <sub>1</sub> (Mo27 x F <sub>1</sub> (687 <sub>4</sub> ))  | 10              | 128             | + | 157 | 285                             | 44,91±2,95              |
| <b>12</b>     | F <sub>1</sub> BC <sub>1</sub> (Mo94 x F <sub>1</sub> (8 <sub>1</sub> ))    | 5               | 38              | + | 109 | 147                             | 25,85±3,61              |
| <b>17</b>     | F <sub>1</sub> BC <sub>1</sub> (Mo56x F <sub>1</sub> (4 <sub>17</sub> ))    | 6               | 44              | + | 87  | 131                             | 33,59±4,13              |
| <b>18</b>     | F <sub>1</sub> BC <sub>1</sub> (Mo48 x F <sub>1</sub> (529 <sub>16</sub> )) | 2               | 38              | + | 15  | 53                              | 71,70±6,19              |
| <b>21</b>     | F <sub>1</sub> BC <sub>1</sub> (Mo42 x F <sub>1</sub> (528 <sub>1</sub> ))  | 3               | 13              | + | 47  | 60                              | 21,67±5,37              |
| <b>22</b>     | F <sub>1</sub> BC <sub>1</sub> (Mo17 x F <sub>1</sub> (685 <sub>7</sub> ))  | 2               | 10              | + | 38  | 48                              | 20,83±5,86              |
| <b>telo 6</b> | F <sub>1</sub> BC <sub>1</sub> (Telo12 xF <sub>1</sub> (542 <sub>8</sub> )) | 1               | 21              | + | 19  | 40                              | 52,50±7,90              |
| <b>telo11</b> | F <sub>1</sub> BC <sub>1</sub> (Mo21xF <sub>1</sub> (100 <sub>1</sub> ))    | 2               | 5               | + | 39  | 44                              | 10,75±3,21              |

Table 10.

**Germination of BC<sub>1</sub>F<sub>1</sub> hybrid seeds obtained from crosses of monosomic and monotelodisome lines with aneuploid F<sub>1</sub> (Mo x Pima 3-79 or Telo x Pima 3-79) hybrids with substitutions of specific chromosomes or their arms**

| <b>Chromosome</b> | <b>Hybrids</b>                                                              | <b>Number of hybrid seeds</b> | <b>Number of shoots</b> | <b>Germination, %</b> |
|-------------------|-----------------------------------------------------------------------------|-------------------------------|-------------------------|-----------------------|
| <b>2</b>          | F <sub>1</sub> BC <sub>1</sub> (Mo16 x F <sub>1</sub> (98 <sub>6</sub> ))   | 32                            | 17                      | 53,13                 |
|                   | F <sub>1</sub> BC <sub>1</sub> (Mo93xF <sub>1</sub> (516 <sub>2</sub> ))    | 3                             | 2                       | 66,67                 |
| <b>4</b>          | F <sub>1</sub> BC <sub>1</sub> (Mo7x F <sub>1</sub> (683 <sub>1</sub> ))    | 6                             | 6                       | 100,00                |
|                   | F <sub>1</sub> BC <sub>1</sub> (Mo31x F <sub>1</sub> (770 <sub>1</sub> ))   | 7                             | 6                       | 85,71                 |
|                   | F <sub>1</sub> BC <sub>1</sub> (Mo38xF <sub>1</sub> (690 <sub>11</sub> ))   | 36                            | 16                      | 44,44                 |
|                   | F <sub>1</sub> BC <sub>1</sub> (Mo58 x F <sub>1</sub> (530 <sub>2</sub> ))  | 15                            | 11                      | 73,33                 |
|                   | F <sub>1</sub> BC <sub>1</sub> (Mo59 x F <sub>1</sub> (531 <sub>2</sub> ))  | 9                             | 7                       | 77,78                 |
|                   | F <sub>1</sub> BC <sub>1</sub> (Mo60 x F <sub>1</sub> (694 <sub>5</sub> ))  | 30                            | 17                      | 56,67                 |
|                   | F <sub>1</sub> BC <sub>1</sub> (Mo75 x F <sub>1</sub> (104 <sub>2</sub> ))  | 19                            | 10                      | 52,63                 |
|                   | F <sub>1</sub> BC <sub>1</sub> (Mo34 x F <sub>1</sub> (688 <sub>9</sub> ))  | 10                            | 10                      | 100,00                |
| <b>6</b>          | F <sub>1</sub> BC <sub>1</sub> (Mo67 x F <sub>1</sub> (308 <sub>1</sub> ))  | 7                             | 4                       | 57,14                 |
|                   | F <sub>1</sub> BC <sub>1</sub> (Mo92 xF <sub>1</sub> (1040 <sub>2</sub> ))  | 8                             | 3                       | 37,50                 |
|                   | F <sub>1</sub> BC <sub>1</sub> (Mo95 x F <sub>1</sub> (106 <sub>2</sub> ))  | 3                             | 3                       | 100,00                |
|                   | F <sub>1</sub> BC <sub>1</sub> (Mo27 x F <sub>1</sub> (687 <sub>4</sub> ))  | 24                            | 18                      | 75,00                 |
| <b>12</b>         | F <sub>1</sub> BC <sub>1</sub> (Mo94 x F <sub>1</sub> (8 <sub>1</sub> ))    | 16                            | 9                       | 56,25                 |
| <b>17</b>         | F <sub>1</sub> BC <sub>1</sub> (Mo56x F <sub>1</sub> (4 <sub>17</sub> ))    | 19                            | 14                      | 73,68                 |
| <b>18</b>         | F <sub>1</sub> BC <sub>1</sub> (Mo48 x F <sub>1</sub> (529 <sub>16</sub> )) | 38                            | 36                      | 94,74                 |
| <b>21</b>         | F <sub>1</sub> BC <sub>1</sub> (Mo42 x F <sub>1</sub> (528 <sub>1</sub> ))  | 13                            | 7                       | 53,85                 |
| <b>22</b>         | F <sub>1</sub> BC <sub>1</sub> (Mo17 x F <sub>1</sub> (685 <sub>7</sub> ))  | 10                            | 5                       | 50,00                 |
| <b>telo 6</b>     | F <sub>1</sub> BC <sub>1</sub> (Telo12 xF <sub>1</sub> (542 <sub>8</sub> )) | 21                            | 19                      | 90,48                 |
| <b>telo 11</b>    | F <sub>1</sub> BC <sub>1</sub> (Mo21xF <sub>1</sub> (100 <sub>1</sub> ))    | 5                             | 3                       | 60,00                 |

Table 11.

Analysis of BC<sub>1</sub>F<sub>1</sub> backcross hybrid offspring obtained from crosses of recurrent parents with aneuploid F<sub>1</sub> (MoxPima 3-79 or Telo x Pima 3-79) hybrids

| Chromosome | Crossing variant                                                        | Total number of hybrid plants in the family | Number of studied plants | Number of disomics (2n=52) | Number of monosomics (2n=51) | Number of monotelodisomics (2n=51+I') |
|------------|-------------------------------------------------------------------------|---------------------------------------------|--------------------------|----------------------------|------------------------------|---------------------------------------|
| 2          | F <sub>1</sub> BC <sub>1</sub> (Mo16xF <sub>1</sub> 98 <sub>6</sub> )   |                                             |                          |                            |                              |                                       |
|            | 507 n                                                                   | 2                                           | 2                        | 2                          | -                            | -                                     |
|            | 922 n                                                                   | 8                                           | 1                        | -                          | -                            | -                                     |
|            | 923 n                                                                   | 8                                           | 2                        | 1                          | 1                            | -                                     |
|            | F <sub>1</sub> BC <sub>1</sub> (Mo93xF <sub>1</sub> 516 <sub>2</sub> )  |                                             |                          |                            |                              |                                       |
|            | 785 n                                                                   | 2                                           | 1                        | 1                          | -                            | -                                     |
| 4          | F <sub>1</sub> BC <sub>1</sub> (Mo7xF <sub>1</sub> 683 <sub>2</sub> )   |                                             |                          |                            |                              |                                       |
|            | 508 n                                                                   | 5                                           | 5                        | 5                          | -                            | -                                     |
|            | F <sub>1</sub> BC <sub>1</sub> (Mo31xF <sub>1</sub> 770 <sub>1</sub> )  |                                             |                          |                            |                              |                                       |
|            | 924 n                                                                   | 6                                           | -                        | -                          | -                            | -                                     |
|            | F <sub>1</sub> BC <sub>1</sub> (Mo38xF <sub>1</sub> 690 <sub>11</sub> ) |                                             |                          |                            |                              |                                       |
|            | 294 n                                                                   | 5                                           | 5                        | 5                          | -                            | -                                     |
|            | 925 n                                                                   | 11                                          | 1                        | -                          | 1                            | -                                     |
|            | F <sub>1</sub> BC <sub>1</sub> (Mo58xF <sub>1</sub> 530 <sub>3</sub> )  |                                             |                          |                            |                              |                                       |
|            | 115 n                                                                   | 4                                           | 2                        | 1                          | 1                            | -                                     |
|            | 116 n                                                                   | 6                                           | 3                        | 3                          | -                            | -                                     |
|            | F <sub>1</sub> BC <sub>1</sub> (Mo59xF <sub>1</sub> 531 <sub>8</sub> )  |                                             |                          |                            |                              |                                       |
|            | 1041 n                                                                  | 7                                           | 7                        | 6                          | 1                            | -                                     |
|            | F <sub>1</sub> BC <sub>1</sub> (Mo60xF <sub>1</sub> 694 <sub>5</sub> )  |                                             |                          |                            |                              |                                       |
|            | 117 n                                                                   | 6                                           | 4                        | 2                          | 2                            | -                                     |
|            | 118 n                                                                   | 5                                           | 1                        | 1                          | -                            | -                                     |
|            | 119 n                                                                   | 5                                           | 2                        | 2                          | -                            | -                                     |
|            | 120 n                                                                   | 1                                           | 1                        | 1                          | -                            | -                                     |
|            | F <sub>1</sub> BC <sub>1</sub> (Mo75xF <sub>1</sub> 104 <sub>2</sub> )  |                                             |                          |                            |                              |                                       |
|            | 298 n                                                                   | 8                                           | 5                        | 3                          | 2                            | -                                     |
| 6          | F <sub>1</sub> BC <sub>1</sub> (Mo34xF <sub>1</sub> 688 <sub>9</sub> )  |                                             |                          |                            |                              |                                       |
|            | 293 n                                                                   | 8                                           | 4                        | 2                          | 2                            | -                                     |
|            | F <sub>1</sub> BC <sub>1</sub> (Mo67xF <sub>1</sub> 308 <sub>1</sub> )  |                                             |                          |                            |                              |                                       |
|            | 509 n                                                                   | 4                                           | 3                        | 3                          | -                            | -                                     |
|            | F <sub>1</sub> BC <sub>1</sub> (Mo92xF <sub>1</sub> 539 <sub>5</sub> )  |                                             |                          |                            |                              |                                       |
|            | 1040 n                                                                  | 3                                           | 3                        | 2                          | 1                            | -                                     |
|            | F <sub>1</sub> BC <sub>1</sub> (Mo95xF <sub>1</sub> 106 <sub>5</sub> )  |                                             |                          |                            |                              |                                       |
|            | 927 n                                                                   | 3                                           | -                        | -                          | -                            | -                                     |
| 7          | F <sub>1</sub> BC <sub>1</sub> (Mo27xF <sub>1</sub> 687 <sub>4</sub> )  |                                             |                          |                            |                              |                                       |
|            | 111 n                                                                   | 8                                           | 3                        | 1                          | 2                            | -                                     |
| 12         | F <sub>1</sub> BC <sub>1</sub> (Mo94xF <sub>1</sub> 8 <sub>1</sub> )    |                                             |                          |                            |                              |                                       |
|            | 299 n                                                                   | 7                                           | 3                        | 1                          | 2                            | -                                     |
|            | 300 n                                                                   | 2                                           | 1                        | 1                          | -                            | -                                     |
| 17         | F <sub>1</sub> BC <sub>1</sub> (Mo56xF <sub>1</sub> 4 <sub>17</sub> )   |                                             |                          |                            |                              |                                       |
|            | 512 n                                                                   | 6                                           | 5                        | 5                          | -                            | -                                     |
|            | 513 n                                                                   | 8                                           | 6                        | 5                          | 1                            | -                                     |
| 18         | F <sub>1</sub> BC <sub>1</sub> (Mo48xF <sub>1</sub> 529 <sub>16</sub> ) |                                             |                          |                            |                              |                                       |
|            | 113 n                                                                   | 14                                          | 6                        | 5                          | 1                            | -                                     |
|            | 114 n                                                                   | 20                                          | 6                        | 4                          | 2                            | -                                     |
| 21         | F <sub>1</sub> BC <sub>1</sub> (Mo42xF <sub>1</sub> 528 <sub>1</sub> )  |                                             |                          |                            |                              |                                       |
|            | 781 n                                                                   | 1                                           | -                        | -                          | -                            | -                                     |
|            | 782 n                                                                   | 4                                           | 2                        | 1                          | 1                            | -                                     |
| 22         | F <sub>1</sub> BC <sub>1</sub> (Mo17xF <sub>1</sub> 685 <sub>7</sub> )  |                                             |                          |                            |                              |                                       |
|            | 109 n                                                                   | 2                                           | 2                        | 2                          | -                            | -                                     |
|            | 110 n                                                                   | 3                                           | 3                        | 1                          | 2                            | -                                     |

|                |                                                                          |    |    |   |   |   |
|----------------|--------------------------------------------------------------------------|----|----|---|---|---|
| <b>telo 6</b>  | F <sub>1</sub> BC <sub>1</sub> (Telo12xF <sub>1</sub> 542 <sub>8</sub> ) |    |    |   |   |   |
|                | 561 n                                                                    | 19 | 11 | 8 | - | 3 |
| <b>telo 11</b> | F <sub>1</sub> BC <sub>1</sub> (Mo21xF <sub>1</sub> 100 <sub>1</sub> )   |    |    |   |   |   |
|                | 291 n                                                                    | 2  | 1  | - | - | 1 |
|                | 292 n                                                                    | 1  | 1  | - | - | 1 |



Table 12.

Pairing of chromosomes at the metaphase I stage of meiosis in aneuploid BC<sub>1</sub>F<sub>1</sub> hybrids obtained from crosses of recurrent parents with aneuploid F<sub>1</sub> hybrids (Mo x Pima 3-79 or Telo x Pima 3-79)

| Chromosome | Crossing variant                                                          | Hybrid            | Number of examined cells in MI | Univalent size | Average number per cell |                                          |
|------------|---------------------------------------------------------------------------|-------------------|--------------------------------|----------------|-------------------------|------------------------------------------|
|            |                                                                           |                   |                                |                | univalent               | Bivalent                                 |
|            | L-458                                                                     | -                 | 11                             | -              | 0                       | 26,00±0,00                               |
|            | Pima 3-79                                                                 | -                 | 12                             | -              | 0                       | 26,00±0,00                               |
|            | F <sub>1</sub> (L-458xPima 3-79)                                          | 680               | 10                             | -              | 0                       | 26,00±0,00                               |
| 2          | F <sub>1</sub> BC <sub>1</sub> (Mo16xF <sub>1</sub> 98 <sub>6</sub> )     | 923 <sub>8</sub>  | 5                              | Large          | 1,00±0,00               | 25,00±0,00                               |
| 4          | F <sub>1</sub> BC <sub>1</sub> (Mo38xF <sub>1</sub> 690 <sub>11</sub> )   | 925 <sub>4</sub>  | 11                             | Medium         | 1,00±0,00               | 25,00±0,00                               |
|            | F <sub>1</sub> BC <sub>1</sub> (Mo58xF <sub>1</sub> 530 <sub>3</sub> )    | 115 <sub>1</sub>  | 21                             | Medium         | 1,00±0,00               | 25,00±0,00                               |
|            | F <sub>1</sub> BC <sub>1</sub> (Mo59xF <sub>1</sub> 531 <sub>8</sub> )    | 1041 <sub>4</sub> | 24                             | Medium         | 1,00±0,00               | 25,00±0,00                               |
|            | F <sub>1</sub> BC <sub>1</sub> (Mo60xF <sub>1</sub> 694 <sub>5</sub> )    | 117 <sub>4</sub>  | 14                             | Medium         | 1,00±0,00               | 25,00±0,00                               |
|            |                                                                           | 117 <sub>5</sub>  | 28                             | Medium         | 1,00±0,00               | 25,00±0,00                               |
|            | F <sub>1</sub> BC <sub>1</sub> (Mo75xF <sub>1</sub> 104 <sub>2</sub> )    | 298 <sub>2</sub>  | 20                             | Medium         | 1,00±0,00               | 24,67±0,25 (closed)-<br>0,33±0,25 (open) |
|            |                                                                           | 298 <sub>3</sub>  | 6                              | Medium         | 1,00±0,00               | 25,00±0,00                               |
| 6          | F <sub>1</sub> BC <sub>1</sub> (Mo34xF <sub>1</sub> 688 <sub>9</sub> )    | 293 <sub>3</sub>  | 4                              | Large          | 1,00±0,00               | 25,00±0,00                               |
|            |                                                                           | 293 <sub>7</sub>  | 4                              | Large          | 1,00±0,00               | 25,00±0,00                               |
|            | F <sub>1</sub> BC <sub>1</sub> (Mo92xF <sub>1</sub> 539 <sub>5</sub> )    | 1040 <sub>2</sub> | 11                             | Large          | 1,00±0,00               | 25,00±0,00                               |
| 7          | F <sub>1</sub> BC <sub>1</sub> (Mo27xF <sub>1</sub> 687 <sub>4</sub> )    | 111 <sub>2</sub>  | 24                             | Medium         | 1,00±0,00               | 25,00±0,00                               |
|            |                                                                           | 111 <sub>5</sub>  | 14                             | Medium         | 1,00±0,00               | 25,00±0,00                               |
| 12         | F <sub>1</sub> BC <sub>1</sub> (Mo94xF <sub>1</sub> 8 <sub>1</sub> )      | 299 <sub>1</sub>  | 12                             | Large          | 1,00±0,00               | 25,00±0,00                               |
|            |                                                                           | 299 <sub>2</sub>  | 9                              | Large          | 1,00±0,00               | 25,00±0,00                               |
| 17         | F <sub>1</sub> BC <sub>1</sub> (Mo56xF <sub>1</sub> 4 <sub>17</sub> )     | 513 <sub>8</sub>  | 6                              | Medium-small   | 1,00±0,00               | 25,00±0,00                               |
| 18         | F <sub>1</sub> BC <sub>1</sub> (Mo48xF <sub>1</sub> 529 <sub>16</sub> )   | 113 <sub>16</sub> | 5                              | Small          | 1,00±0,00               | 25,00±0,00                               |
|            |                                                                           | 114 <sub>1</sub>  | 36                             | Small          | 1,00±0,00               | 25,00±0,00                               |
|            |                                                                           | 114 <sub>20</sub> | 10                             | Small          | 1,00±0,00               | 25,00±0,00                               |
| 21         | F <sub>1</sub> BC <sub>1</sub> (Mo42xF <sub>1</sub> 528 <sub>1</sub> )    | 782 <sub>1</sub>  | 5                              | Medium-small   | 1,00±0,00               | 25,00±0,00                               |
| 22         | F <sub>1</sub> BC <sub>1</sub> (Mo17xF <sub>1</sub> 685 <sub>7</sub> )    | 110 <sub>1</sub>  | 7                              | Medium-small   | 1,00±0,00               | 25,00±0,00                               |
|            |                                                                           | 110 <sub>3</sub>  | 8                              | Medium-small   | 1,00±0,00               | 24,25±0,35**                             |
| telo 6     | F <sub>1</sub> BC <sub>1</sub> (Telo12x F <sub>1</sub> 542 <sub>8</sub> ) | 561 <sub>15</sub> | 21                             | 0              | 0                       | 26,00±0,00*                              |
|            |                                                                           | 561 <sub>17</sub> | 18                             | 0              | 0                       | 26,00±0,00*                              |
| telo 11    | F <sub>1</sub> BC <sub>1</sub> (Mo21x F <sub>1</sub> 100 <sub>1</sub> )   | 291 <sub>1</sub>  | 17                             | 0              | 0                       | 26,00±0,00*                              |
|            |                                                                           | 292 <sub>1</sub>  | 12                             | 0              | 0                       | 26,00±0,00*                              |

\* Note –25 normal (closed) bivalents and one heteromorphic (open) bivalent.

\*\* Note - one univalent plus from 23 to 25 normal (closed) bivalents and one quadrivalent ( $0.38 \pm 0.17$  on average per cell).

Table 13.

Analysis of spores in BC<sub>1</sub>F<sub>1</sub> hybrids obtained from crosses of recurrent parents with aneuploid F<sub>1</sub> hybrids  
(Mo x Pima 3-79 or Telo x Pima 3-79)

| Chromosome     | Crossing variant                                                         | Hybrid            | Total number of microspores | Meiotic index, % | % of tetrads with micronuclei |
|----------------|--------------------------------------------------------------------------|-------------------|-----------------------------|------------------|-------------------------------|
|                | L-458                                                                    | -                 | 1121                        | 99,38±0,24       | 0,00±0,00                     |
|                | Pima 3-79                                                                | -                 | 1130                        | 98,58±0,35       | 0,27±0,15                     |
|                | F <sub>1</sub> L-458 x Pima 3-79                                         | 680               | 2535                        | 98,62±0,23       | 0,04±0,04                     |
| <b>2</b>       | F <sub>1</sub> BC <sub>1</sub> (Mo16xF <sub>1</sub> 98 <sub>6</sub> )    | 923 <sub>8</sub>  | -                           | -                | -                             |
|                | F <sub>1</sub> BC <sub>1</sub> (Mo38xF <sub>1</sub> 690 <sub>11</sub> )  | 925 <sub>4</sub>  | 384                         | 95,31±1,08       | 2,60±0,81                     |
|                | F <sub>1</sub> BC <sub>1</sub> (Mo58xF <sub>1</sub> 530 <sub>3</sub> )   | 115 <sub>1</sub>  | 5534                        | 95,61±0,28       | 0,11±0,04                     |
|                | F <sub>1</sub> BC <sub>1</sub> (Mo59x F <sub>1</sub> 531 <sub>8</sub> )  | 1041 <sub>4</sub> | 2485                        | 98,99±0,20       | 0,12±0,07                     |
|                | F <sub>1</sub> BC <sub>1</sub> (Mo60xF <sub>1</sub> 694 <sub>5</sub> )   | 117 <sub>4</sub>  | 2715                        | 92,90±2,66       | 0,44±0,19                     |
|                |                                                                          | 117 <sub>5</sub>  | 1703                        | 95,71±0,49       | 1,17±0,26                     |
|                | F <sub>1</sub> BC <sub>1</sub> (Mo75x F <sub>1</sub> 104 <sub>2</sub> )  | 298 <sub>2</sub>  | 1168                        | 96,48±0,54       | 0,94±0,28                     |
|                |                                                                          | 298 <sub>3</sub>  | 598                         | 96,49±0,75       | 1,34±0,47                     |
| <b>6</b>       | F <sub>1</sub> BC <sub>1</sub> (Mo34xF <sub>1</sub> 688 <sub>9</sub> )   | 293 <sub>3</sub>  | 6450                        | 95,72±0,25       | 0,99±0,12                     |
|                |                                                                          | 293 <sub>7</sub>  | 5586                        | 98,69±0,15       | 0,05±0,03                     |
|                | F <sub>1</sub> BC <sub>1</sub> (Mo92xF <sub>1</sub> 539 <sub>5</sub> )   | 1040 <sub>2</sub> | 663                         | 89,89±1,17       | 1,21±0,42                     |
| <b>7</b>       | F <sub>1</sub> BC <sub>1</sub> (Mo27xF <sub>1</sub> 687 <sub>4</sub> )   | 111 <sub>2</sub>  | 1292                        | 95,43±0,58       | 0,54±0,20                     |
|                |                                                                          | 111 <sub>5</sub>  | 657                         | 96,65±0,70       | 0,61±0,30                     |
| <b>12</b>      | F <sub>1</sub> BC <sub>1</sub> (Mo94xF <sub>1</sub> 8 <sub>1</sub> )     | 299 <sub>1</sub>  | -                           | -                | -                             |
|                |                                                                          | 299 <sub>2</sub>  | 1486                        | 96,37±0,49       | 1,55±0,32                     |
| <b>17</b>      | F <sub>1</sub> BC <sub>1</sub> (Mo56xF <sub>1</sub> 41 <sub>7</sub> )    | 513 <sub>8</sub>  | -                           | -                | -                             |
| <b>18</b>      | F <sub>1</sub> BC <sub>1</sub> (Mo48xF <sub>1</sub> 529 <sub>16</sub> )  | 113 <sub>16</sub> | -                           | -                | -                             |
|                |                                                                          | 114 <sub>1</sub>  | 2000                        | 97,95±0,32       | 0,85±0,21                     |
|                |                                                                          | 114 <sub>20</sub> | 3170                        | 97,60±0,27       | 0,06±0,04                     |
| <b>21</b>      | F <sub>1</sub> BC <sub>1</sub> (Mo42xF <sub>1</sub> 528 <sub>1</sub> )   | 782 <sub>1</sub>  | -                           | -                | -                             |
| <b>22</b>      | F <sub>1</sub> BC <sub>1</sub> (Mo17xF <sub>1</sub> 685 <sub>7</sub> )   | 110 <sub>1</sub>  | 3038                        | 99,37±0,14       | 0,07±0,05                     |
|                |                                                                          | 110 <sub>3</sub>  | 2806                        | 98,97±0,19       | 0,14±0,07                     |
| <b>telo 6</b>  | F <sub>1</sub> BC <sub>1</sub> (Telo12xF <sub>1</sub> 542 <sub>8</sub> ) | 561 <sub>15</sub> | 2106                        | 98,43±0,27       | 0,90±0,21                     |
|                |                                                                          | 561 <sub>17</sub> | -                           | -                | -                             |
| <b>telo 11</b> | F <sub>1</sub> BC <sub>1</sub> (Mo21xF <sub>1</sub> 100 <sub>1</sub> )   | 291 <sub>1</sub>  | 548                         | 92,34±1,14       | 2,55±0,67                     |
|                |                                                                          | 292 <sub>1</sub>  | 2191                        | 92,38±0,57       | 2,46±0,33                     |

**Table 14.**

**Analysis of pollen fertility in aneuploid BC<sub>1</sub>F<sub>1</sub> hybrids obtained from crosses of recurrent parents with aneuploid F<sub>1</sub> hybrids (Mo x Pima 3-79 or Telo x Pima 3-79)**

| Chromosome     | Crossing variant                                                         | Hybrid            | Total pollen count | Pollen fertility, % | Pollen sterility, % |
|----------------|--------------------------------------------------------------------------|-------------------|--------------------|---------------------|---------------------|
|                | L-458                                                                    | -                 | 628                | 90,92 ± 1,15        | 9,08 ± 1,15         |
|                | Pima 3-79                                                                | -                 | 581                | 84,34 ± 1,51        | 15,66 ± 1,51        |
|                | F <sub>1</sub> L-458 x Pima 3-79                                         | 680               | 536                | 80,78 ± 1,70        | 19,22 ± 1,70        |
| <b>2</b>       | F <sub>1</sub> BC <sub>1</sub> (Mo16xF <sub>1</sub> 98 <sub>6</sub> )    | 923 <sub>8</sub>  | -                  | -                   | -                   |
| <b>4</b>       | F <sub>1</sub> BC <sub>1</sub> (Mo38xF <sub>1</sub> 690 <sub>11</sub> )  | 925 <sub>4</sub>  | -                  | -                   | -                   |
|                | F <sub>1</sub> BC <sub>1</sub> (Mo58xF <sub>1</sub> 530 <sub>3</sub> )   | 115 <sub>1</sub>  | 1789               | 91,45 ± 0,66        | 8,55 ± 0,66         |
|                | F <sub>1</sub> BC <sub>1</sub> (Mo59xF <sub>1</sub> 531 <sub>8</sub> )   | 1041 <sub>4</sub> | 1048               | 89,79 ± 0,94        | 10,21 ± 0,94        |
|                | F <sub>1</sub> BC <sub>1</sub> (Mo60xF <sub>1</sub> 694 <sub>3</sub> )   | 117 <sub>4</sub>  | 1048               | 67,27 ± 1,45        | 32,73 ± 1,45        |
|                |                                                                          | 117 <sub>5</sub>  | 715                | 78,60 ± 1,53        | 21,40 ± 1,53        |
|                | F <sub>1</sub> BC <sub>1</sub> (Mo75xF <sub>1</sub> 104 <sub>2</sub> )   | 298 <sub>2</sub>  | 576                | 84,38 ± 1,51        | 15,63 ± 1,51        |
|                |                                                                          | 298 <sub>3</sub>  | -                  | -                   | -                   |
| <b>6</b>       | F <sub>1</sub> BC <sub>1</sub> (Mo34xF <sub>1</sub> 688 <sub>9</sub> )   | 293 <sub>3</sub>  | 1019               | 84,89 ± 1,12        | 15,1 ± 1,12         |
|                |                                                                          | 293 <sub>7</sub>  | 480                | 90,63 ± 1,33        | 9,38 ± 1,33         |
|                | F <sub>1</sub> BC <sub>1</sub> (Mo92xF <sub>1</sub> 539 <sub>5</sub> )   | 1040 <sub>2</sub> | 1341               | 81,80 ± 1,05        | 18,20 ± 1,05        |
| <b>7</b>       | F <sub>1</sub> BC <sub>1</sub> (Mo27xF <sub>1</sub> 687 <sub>4</sub> )   | 111 <sub>2</sub>  | 538                | 80,30 ± 1,71        | 19,70 ± 1,71        |
|                |                                                                          | 111 <sub>5</sub>  | 572                | 83,57 ± 1,55        | 16,43 ± 1,55        |
| <b>12</b>      | F <sub>1</sub> BC <sub>1</sub> (Mo94xF <sub>1</sub> 81)                  | 299 <sub>1</sub>  | 719                | 96,38±0,70          | 3,62±0,70           |
|                |                                                                          | 299 <sub>2</sub>  | 640                | 95,63±0,81          | 4,38±0,81           |
| <b>17</b>      | F <sub>1</sub> BC <sub>1</sub> (Mo56xF <sub>1</sub> 417)                 | 513 <sub>8</sub>  | 669                | 90,43±1,14          | 9,57±1,14           |
| <b>18</b>      | F <sub>1</sub> BC <sub>1</sub> (Mo48xF <sub>1</sub> 529 <sub>16</sub> )  | 113 <sub>16</sub> | -                  | -                   | -                   |
|                |                                                                          | 114 <sub>1</sub>  | 687                | 81,51 ± 1,48        | 18,49 ± 1,48        |
|                |                                                                          | 114 <sub>20</sub> | 491                | 95,72 ± 0,91        | 4,28 ± 0,91         |
| <b>21</b>      | F <sub>1</sub> BC <sub>1</sub> (Mo42xF <sub>1</sub> 528 <sub>1</sub> )   | 782 <sub>1</sub>  | -                  | -                   | -                   |
| <b>22</b>      | F <sub>1</sub> BC <sub>1</sub> (Mo17xF <sub>1</sub> 685 <sub>7</sub> )   | 110 <sub>1</sub>  | 680                | 72,35±1,72          | 27,65±1,72          |
|                |                                                                          | 110 <sub>3</sub>  | 1510               | 82,38±0,98          | 17,62±0,98          |
| <b>telo 6</b>  | F <sub>1</sub> BC <sub>1</sub> (Telo12xF <sub>1</sub> 542 <sub>8</sub> ) | 561 <sub>15</sub> | 655                | 85,65±1,37          | 14,35±1,37          |
|                |                                                                          | 561 <sub>17</sub> | -                  | -                   | -                   |
| <b>telo 11</b> | F <sub>1</sub> BC <sub>1</sub> (Mo21xF <sub>1</sub> 100 <sub>1</sub> )   | 291 <sub>1</sub>  | 661                | 89,41±1,20          | 10,59±1,20          |
|                |                                                                          | 292 <sub>1</sub>  | 453                | 91,61 ± 1,30        | 8,39 ± 1,30         |
